# Supplementary material
Source: PubMed Central journal article supplement (PMC3035574)

## Supplemental Material

Michael Holinstat *et al.* PAR signaling in platelets activates cPLA<sub>2</sub> differently for COX-1 and 12-LOX catalysis

### Legends for Supplementary Figures

#### **Figure I: residual COX-1 activity following platelet activation with PAR-APs.**

Platelets were activated with PAR1-AP (20  $\mu$ M), PAR4-AP (200  $\mu$ M) or vehicle for 1 min. At this time [<sup>2</sup>H<sub>8</sub>] arachidonic acid (20  $\mu$ M) was added. After 2 min, the reaction was stopped as described in material and methods and TxB<sub>2</sub> was analyzed by mass spectrometry. \*: p < 0.05 with control (ANOVA with Dunn's multiple comparison test).

#### **Figure II: PMA induces platelet aggregation but not release of eicosanoids.**

**a)** Platelets were treated with 100 nM PMA, 1000 nM PMA or vehicle and aggregation was measured for 10 minutes. PMA induced full platelet aggregation at both concentrations tested (N=7). **b)** Platelet calcium mobilization was measured following stimulation with 20 nM thrombin, 40  $\mu$ M PAR1-AP, 400  $\mu$ M PAR4-AP or 1000 nM PMA at the EC<sub>100</sub> for calcium mobilization. Thrombin, PAR1-AP and PAR4-AP showed their characteristic curves for calcium mobilization, while PMA was unable to induce calcium mobilization even at a high concentration.

Figure I

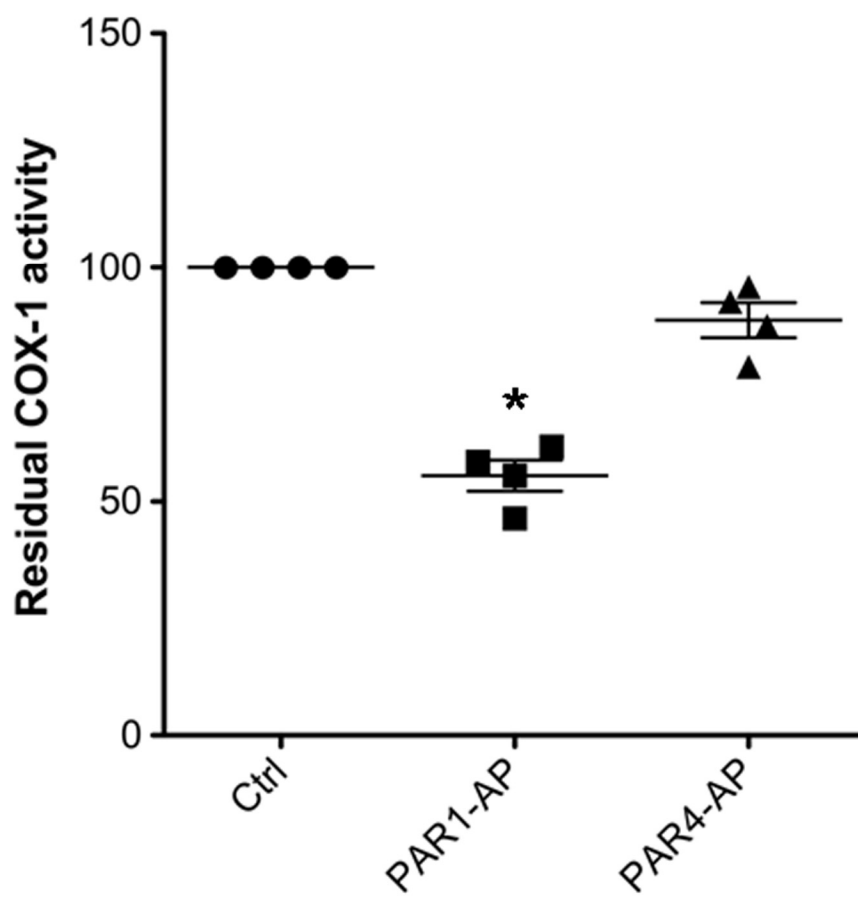

Figure II

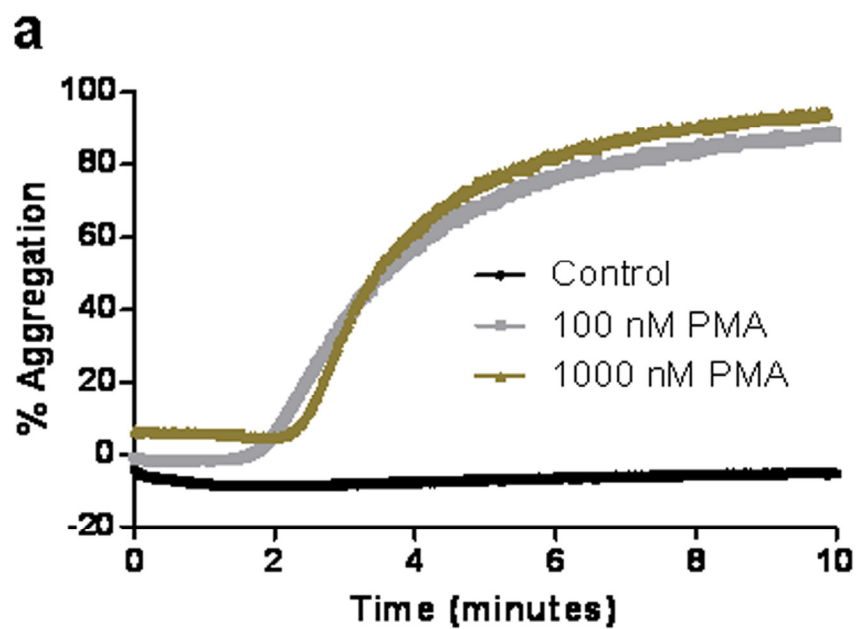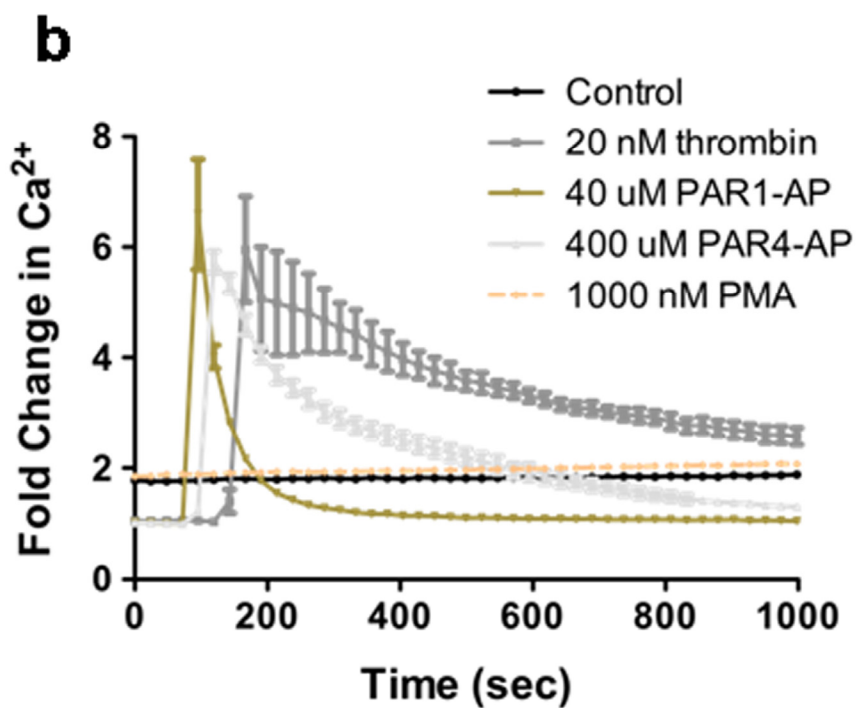

Supplement: NIHMS261586-supplement-supplement.pdf [file NIHMS261586-supplement-supplement.pdf]
